# Supplementary material
Source: Elsevier journal article supplement (https://rcastoragev2.blob.core.windows.net/a86db0e37a706d39b94bf884dcc57da5/mmc1.pdf)
Supplement: mmc1 [file mmc1.pdf]

# THE LANCET

## Digital Health

### **Supplementary appendix**

This appendix formed part of the original submission and has been peer reviewed.  
We post it as supplied by the authors.

Supplement to: Stewart C, Ranjan Y, Conde P, et al. Physiological presentation and risk factors of long COVID in the UK using smartphones and wearable devices: a longitudinal, citizen science, case-control study. *Lancet Digit Health* 2024; published online Aug 12. [https://doi.org/10.1016/S2589-7500\(24\)00140-7](https://doi.org/10.1016/S2589-7500(24)00140-7).

## Table of Contents

|                                                                            |          |
|----------------------------------------------------------------------------|----------|
| <b>Table of collected mobile health metrics.....</b>                       | <b>1</b> |
| <b>Flow chart .....</b>                                                    | <b>2</b> |
| <b>Group-wide analysis visual summary.....</b>                             | <b>3</b> |
| <b>RHR-defined L-COVID analysis visual summary .....</b>                   | <b>3</b> |
| <b>Groupwise adjusted logistic regression. ....</b>                        | <b>4</b> |
| <b>Control matching algorithm .....</b>                                    | <b>5</b> |
| <b>Participant engagement patterns in the first year of enrolment.....</b> | <b>6</b> |
| <b>Strobe Checklist.....</b>                                               | <b>7</b> |

**Table of collected mobile health metrics**

| Category       | Metric                        | Frequency             | Description                                                                                                                                      |
|----------------|-------------------------------|-----------------------|--------------------------------------------------------------------------------------------------------------------------------------------------|
| Questionnaires | PHQ-8                         | 14 days               | A measure designed to assess the severity of depression <sup>10</sup>                                                                            |
|                | GAD-7                         | 14 days               | A measure designed to assess the severity of generalised anxiety <sup>11</sup>                                                                   |
|                | Arousal-Valence               | Ad-hoc / twice-weekly | A self-rated continuous scale of current happiness and energy, aiming to correspond to emotional valence and arousal <sup>12</sup> .             |
|                | Symptoms relating to COVID-19 | Ad-hoc / twice-weekly |                                                                                                                                                  |
| Fitbit         | Diagnosis                     | Ad-hoc                | Self report diagnosis by Antigen, PCR, Symptom                                                                                                   |
|                | Heart rate                    | Daily                 | Daily resting heart rate provided by Fitbit Web & API. <sup>13</sup>                                                                             |
|                | Heart rate variability        | Daily                 | Daily root mean square of successive differences (RMSSD) provided by Fitbit Web API <sup>14</sup>                                                |
|                | Sleep duration                | Per-sleep             | Estimated duration of a sleep <sup>15</sup>                                                                                                      |
|                | Sleep efficiency              | Per-sleep             | Fitbit calculates a score for each recorded sleep based on duration, heart rate, motion, and time spent in detected sleep stages <sup>15</sup> . |
|                | Step count                    | Daily                 | 15                                                                                                                                               |
|                | Activity log                  | Daily                 | 15                                                                                                                                               |

*Table 1 Active and passive mobile health metrics collected in this study.*

## Flow chart

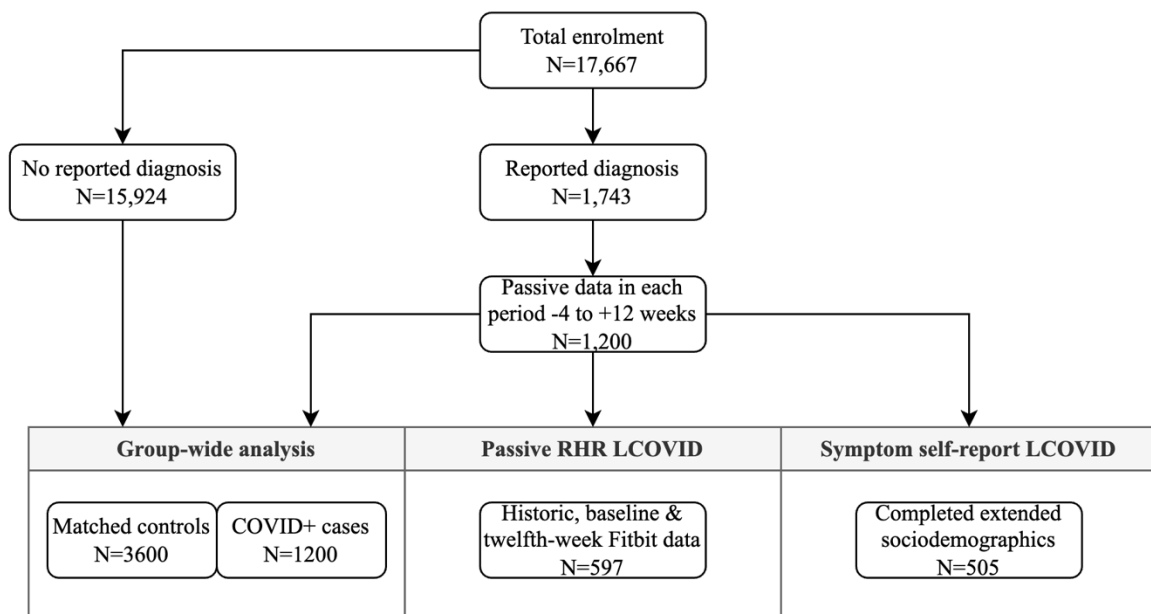

A flow chart showing participants numbers at different stages of the study. The matched controls were included from the no-diagnosis cohort if the matched participant had active self-reported data present at least twelve weeks after the matched date. The rationale was to only include participants who were still actively engaged and therefore likely to have reported a diagnosis if they had been COVID-positive during the study. The selection criteria for the passive RHR LCOVID group is given in the main text.

## Group-wide analysis visual summary

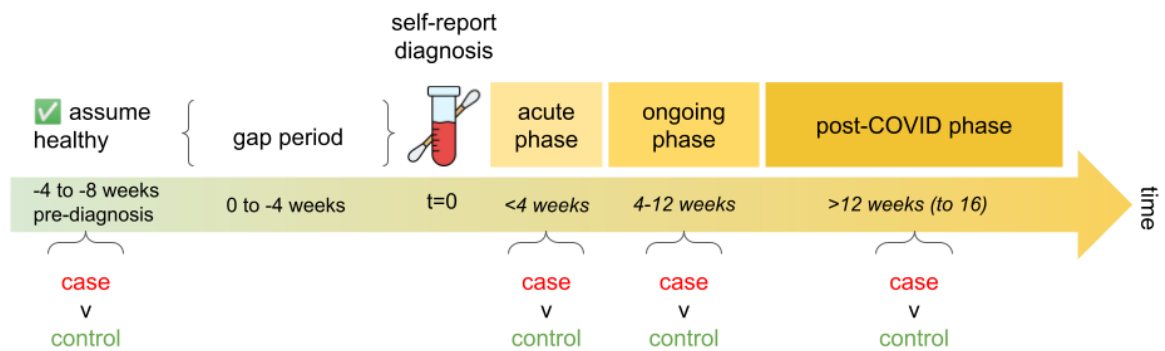

## RHR-defined L-COVID analysis visual summary

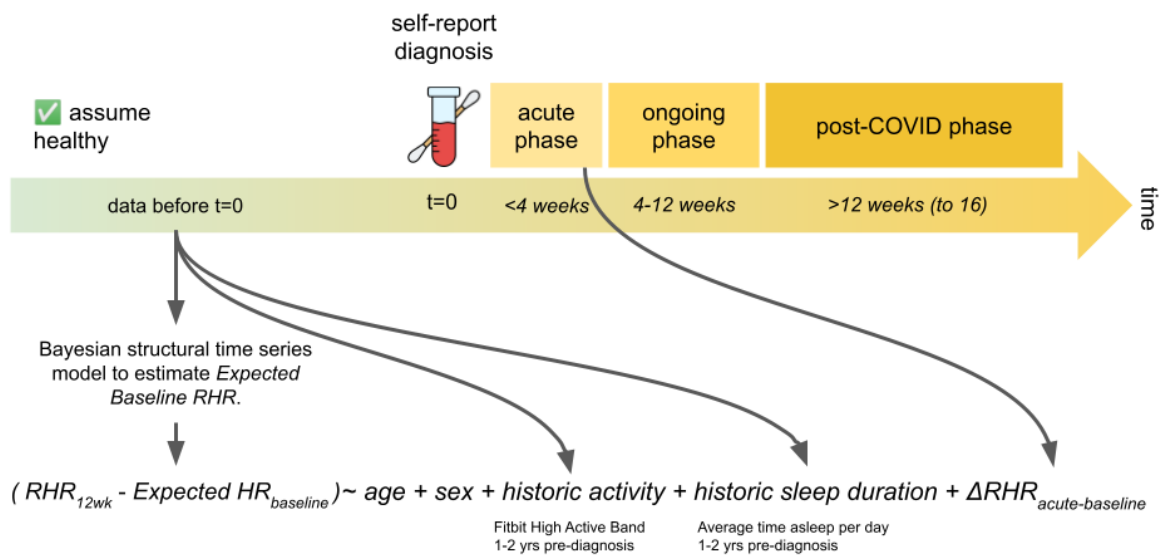

**Groupwide adjusted logistic regression.**

| Metric                   | Acute   |                        |                    | Ongoing |                        |                    | Post    |                        |                  |
|--------------------------|---------|------------------------|--------------------|---------|------------------------|--------------------|---------|------------------------|------------------|
|                          | OR      | 95% CI                 | p-value            | OR      | 95% CI                 | p-value            | OR      | 95% CI                 | p-value          |
| RHR (bpm)                | 1.06016 | [1.03432<br>1.08665]   | <b>&lt;0.0001*</b> | 1.10917 | [1.08139<br>1.13766]   | <b>&lt;0.0001*</b> | 1.04090 | [1.01522<br>1.06724]   | <b>1.66e-03*</b> |
| RMSSD                    | 0.99719 | [0.736738<br>1.34972]  | 0.99               | 1.09565 | [0.81919<br>1.4654]    | 0.54               | 1.00654 | [0.674165<br>1.50277]  | 0.97             |
| Steps                    | 0.99985 | [0.999831<br>0.999874] | <b>&lt;0.0001*</b> | 0.99996 | [0.999944<br>0.999982] | <b>1.14e-04*</b>   | 0.99998 | [0.999958<br>0.999996] | <b>0.02*</b>     |
| Sleep efficiency         | 0.99379 | [0.982824<br>1.00487]  | 0.27               | 0.99846 | [0.987196<br>1.00984]  | 0.79               | 0.99494 | [0.984147<br>1.00585]  | 0.36             |
| Sleep duration (minutes) | 0.99957 | [0.998322<br>1.00082]  | 0.50               | 1.00025 | [0.999002<br>1.0015]   | 0.69               | 1.00041 | [0.999176<br>1.00164]  | 0.52             |
| PHQ-8                    | 1.06783 | [1.05086<br>1.08508]   | <b>&lt;0.0001*</b> | 1.04553 | [1.02557<br>1.06588]   | <b>&lt;0.0001*</b> | 1.03397 | [1.01117<br>1.05728]   | <b>3.32e-03*</b> |
| GAD-7                    | 1.02452 | [1.00641<br>1.04295]   | <b>7.77e-03*</b>   | 1.02012 | [0.998576<br>1.04214]  | 0.07               | 1.03016 | [1.00568<br>1.05524]   | <b>0.02*</b>     |
| Arousal                  | 0.16237 | [0.129536<br>0.203514] | <b>&lt;0.0001*</b> | 0.51754 | [0.404985<br>0.661368] | <b>&lt;0.0001*</b> | 0.63717 | [0.483652<br>0.839404] | <b>1.35e-03*</b> |
| Valence                  | 0.29167 | [0.231234<br>0.367899] | <b>&lt;0.0001*</b> | 0.65344 | [0.507303<br>0.841683] | <b>9.86e-04*</b>   | 0.75447 | [0.564517<br>1.00833]  | 0.06             |

### **Control matching algorithm**

For each case participant we match 3 control participants.

1. Repeat 3 times:
  - a. For each case, match all other participants that fit the following criteria:
    - i. Same sex
    - ii. Within 2 years of age
    - iii. With at least one active task (questionnaire) completed at least 12-weeks after the matched case's date of COVID diagnosis.
  - b. Select one random matching participant without replacement.

The requirement for one active task is designed to reduce the likelihood of matching a participant who has dropped out or is inactive and could have contracted an unreported case of COVID-19 while still donating passive data.

### Participant engagement patterns in the first year of enrolment

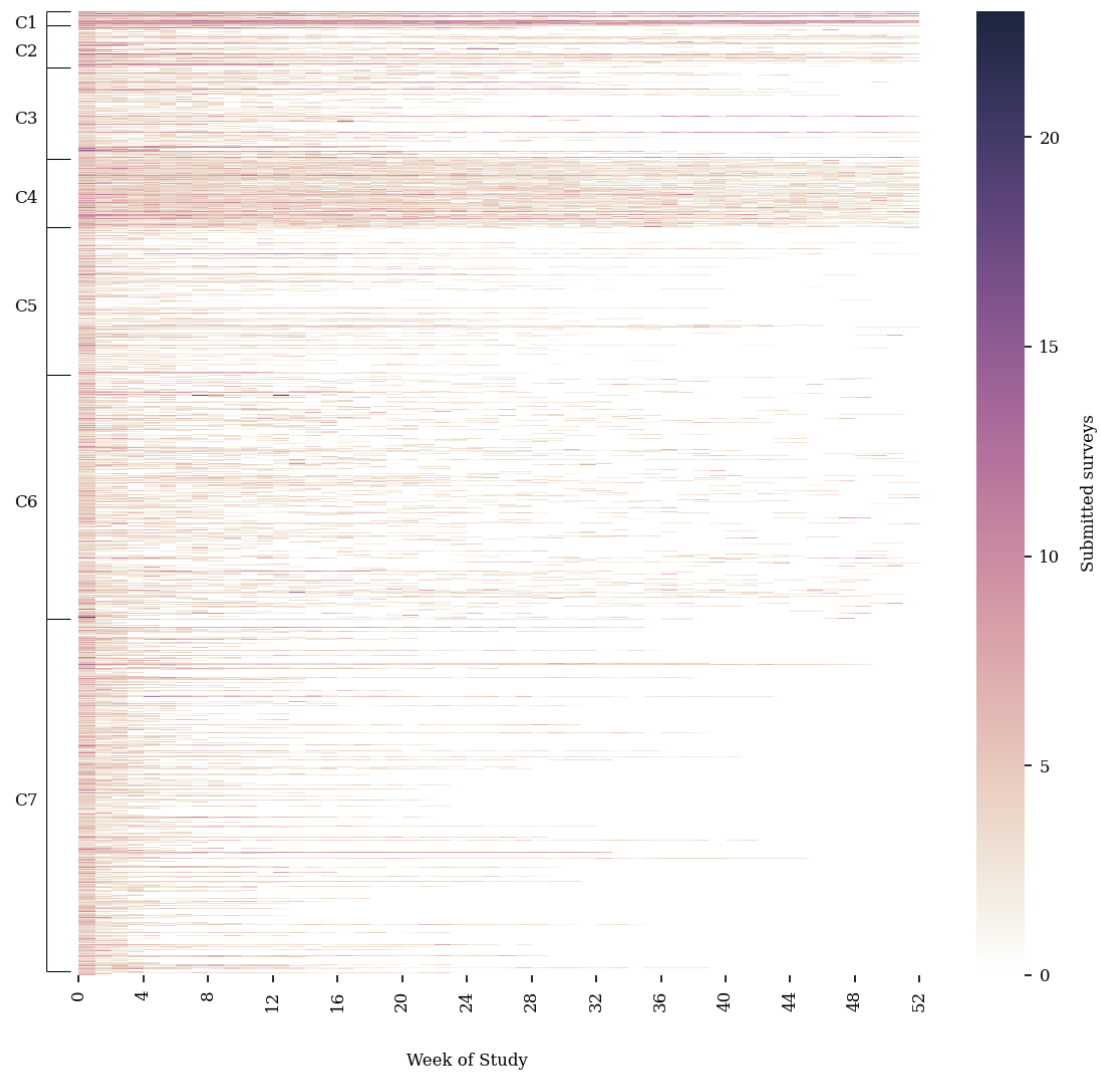

*A heatmap showing the number of submitted questionnaires in the first year of enrolment across 11299 participants. Participants were clustered using a hidden Markov model approach to aid visualization of different patterns of engagement.*



## Strobe Checklist

|                          | Item No | Recommendation                                                                                                                                                                                    | Page number    |
|--------------------------|---------|---------------------------------------------------------------------------------------------------------------------------------------------------------------------------------------------------|----------------|
| Title and abstract       | 1       | (a) Indicate the study’s design with a commonly used term in the title or the abstract                                                                                                            | 1              |
|                          |         | (b) Provide in the abstract an informative and balanced summary of what was done and what was found                                                                                               | 1              |
| <b>Introduction</b>      |         |                                                                                                                                                                                                   |                |
| Background/rationale     | 2       | Explain the scientific background and rationale for the investigation being reported                                                                                                              | 4              |
| Objectives               | 3       | State specific objectives, including any prespecified hypotheses                                                                                                                                  | 4              |
| <b>Methods</b>           |         |                                                                                                                                                                                                   |                |
| Study design             | 4       | Present key elements of study design early in the paper                                                                                                                                           | 5              |
| Setting                  | 5       | Describe the setting, locations, and relevant dates, including periods of recruitment, exposure, follow-up, and data collection                                                                   | 5              |
| Participants             | 6       | (a) Give the eligibility criteria, and the sources and methods of case ascertainment and control selection. Give the rationale for the choice of cases and controls                               | 5              |
|                          |         | (b) For matched studies, give matching criteria and the number of controls per case                                                                                                               | 5              |
| Variables                | 7       | Clearly define all outcomes, exposures, predictors, potential confounders, and effect modifiers. Give diagnostic criteria, if applicable                                                          | 5              |
| Data sources/measurement | 8*      | For each variable of interest, give sources of data and details of methods of assessment (measurement). Describe comparability of assessment methods if there is more than one group              | 5, Appendix p2 |
| Bias                     | 9       | Describe any efforts to address potential sources of bias                                                                                                                                         | 5, 13          |
| Study size               | 10      | Explain how the study size was arrived at                                                                                                                                                         | 5              |
| Quantitative variables   | 11      | Explain how quantitative variables were handled in the analyses. If applicable, describe which groupings were chosen and why                                                                      | 6              |
| Statistical methods      | 12      | (a) Describe all statistical methods, including those used to control for confounding                                                                                                             | 6              |
|                          |         | (b) Describe any methods used to examine subgroups and interactions                                                                                                                               | -              |
|                          |         | (c) Explain how missing data were addressed                                                                                                                                                       | 11             |
|                          |         | (d) If applicable, explain how matching of cases and controls was addressed                                                                                                                       | 7, Appendix p6 |
|                          |         | (e) Describe any sensitivity analyses                                                                                                                                                             | -              |
| <b>Results</b>           |         |                                                                                                                                                                                                   |                |
| Participants             | 13*     | (a) Report numbers of individuals at each stage of study—eg numbers potentially eligible, examined for eligibility, confirmed eligible, included in the study, completing follow-up, and analysed | 5, 9, 11       |
|                          |         | (b) Give reasons for non-participation at each stage                                                                                                                                              |                |
|                          |         | (c) Consider use of a flow diagram                                                                                                                                                                | Appendix p3    |

|                   |     |                                                                                                                                                                                                              |                            |
|-------------------|-----|--------------------------------------------------------------------------------------------------------------------------------------------------------------------------------------------------------------|----------------------------|
| Descriptive data  | 14* | (a) Give characteristics of study participants (eg demographic, clinical, social) and information on exposures and potential confounders                                                                     | P6                         |
|                   |     | (b) Indicate number of participants with missing data for each variable of interest                                                                                                                          | 11                         |
| Outcome data      | 15* | Report numbers in each exposure category, or summary measures of exposure                                                                                                                                    | 5, 11                      |
| Main results      | 16  | (a) Give unadjusted estimates and, if applicable, confounder-adjusted estimates and their precision (eg, 95% confidence interval). Make clear which confounders were adjusted for and why they were included | 8, 10, 11, Appendix p5     |
|                   |     | (b) Report category boundaries when continuous variables were categorized                                                                                                                                    | 11                         |
|                   |     | (c) If relevant, consider translating estimates of relative risk into absolute risk for a meaningful time period                                                                                             | -                          |
| Other analyses    | 17  | Report other analyses done—eg analyses of subgroups and interactions, and sensitivity analyses                                                                                                               | 10                         |
| Discussion        |     |                                                                                                                                                                                                              |                            |
| Key results       | 18  | Summarise key results with reference to study objectives                                                                                                                                                     | 12, 13                     |
| Limitations       | 19  | Discuss limitations of the study, taking into account sources of potential bias or imprecision. Discuss both direction and magnitude of any potential bias                                                   | 13, 14                     |
| Interpretation    | 20  | Give a cautious overall interpretation of results considering objectives, limitations, multiplicity of analyses, results from similar studies, and other relevant evidence                                   | 13, 14                     |
| Generalisability  | 21  | Discuss the generalisability (external validity) of the study results                                                                                                                                        | 14                         |
| Other information |     |                                                                                                                                                                                                              |                            |
| Funding           | 22  | Give the source of funding and the role of the funders for the present study and, if applicable, for the original study on which the present article is based                                                | Abstract, Acknowledgements |
